# Supplementary material
Source: Springer Nature journal article supplement (https://www.springermedizin.de/resource/supplementary/12880_2008_68_MOESM2_ESM.pdf/9450470)

Precontrast

Postcontrast

Precontrast Postcontrast

Day 1

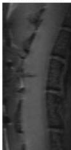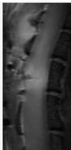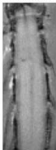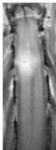

Day 3

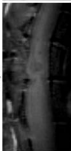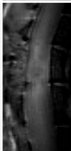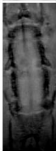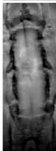

Supplement: MOESM2 [file 9450470]
